# Supplementary material
Source: PubMed Central journal article supplement (PMC9476500)
Supplement: ao2c02794_si_001.pdf [file ao2c02794_si_001.pdf]

## Supporting Information

### Vandetanib Blocks the Cytokine Storm in SARS-CoV-2 Infected Mice

Ana C. Puhl<sup>1\*#</sup>, Giovanni F. Gomes<sup>2\*</sup>, Samara Damasceno<sup>2</sup>, Ethan J. Fritch<sup>3</sup>, James A. Levi<sup>4</sup>, Nicole J. Johnson<sup>4</sup>, Frank Scholle<sup>4</sup>, Lakshmanane Premkumar<sup>3</sup>, Brett L. Hurst<sup>5,6</sup>, Felipe LeeMontiel<sup>7</sup>, Flavio P. Veras<sup>2</sup>, Sabrina S. Batah<sup>8</sup>, Alexandre T. Fabro<sup>8</sup>, Nathaniel J. Moorman<sup>3,9,10</sup>, Boyd L. Yount<sup>11</sup>, Rebekah J. Dickmader<sup>3,9,10</sup>, Ralph S. Baric<sup>3,9,11</sup>, Kenneth H. Pearce<sup>10,12</sup>, Fernando Q. Cunha<sup>2</sup>, José C. Alves-Filho<sup>2#</sup>, Thiago M. Cunha<sup>2#</sup> and Sean Ekins<sup>1#</sup>.

<sup>1</sup>Collaborations Pharmaceuticals, Inc., 840 Main Campus Drive, Lab 3510, Raleigh, NC 27606, USA.

<sup>2</sup>Center for Research in Inflammatory Diseases (CRID), Ribeirao Preto Medical School, University of Sao Paulo, Avenida Bandeirantes, 3900, Ribeirao Preto, 14049-900 ; Sao Paulo, Brazil.

<sup>3</sup>Department of Microbiology and Immunology, University of North Carolina School of Medicine, Chapel Hill NC 27599, USA.

<sup>4</sup>Department of Biological Sciences, North Carolina State University, Raleigh, NC, USA.

<sup>5</sup>Institute for Antiviral Research, Utah State University, Logan, UT, USA.

<sup>6</sup>Department of Animal, Dairy and Veterinary Sciences, Utah State University, Logan, UT, USA.

<sup>7</sup>PhenoVista Biosciences, 6195 Cornerstone Ct E. #114 San Diego CA 92121.

<sup>8</sup>Department of Pathology and Legal Medicine, Ribeirão Preto Medical School, University of São Paulo, Ribeirão Preto, Brazil.

<sup>9</sup>Rapidly Emerging Antiviral Drug Discovery Initiative, University of North Carolina at Chapel Hill, Chapel Hill, NC, USA.

<sup>10</sup>Center for Integrative Chemical Biology and Drug Discovery, Chemical Biology and Medicinal Chemistry, Eshelman School of Pharmacy, University of North Carolina, Chapel Hill, North Carolina 27599, USA.

<sup>11</sup>Department of Epidemiology, Gillings School of Public Health, University of North Carolina at Chapel Hill, Chapel Hill, NC, USA.

<sup>12</sup>UNC Lineberger Comprehensive Cancer Center, Chapel Hill, North Carolina 27599, USA.

\* Both authors contributed equally

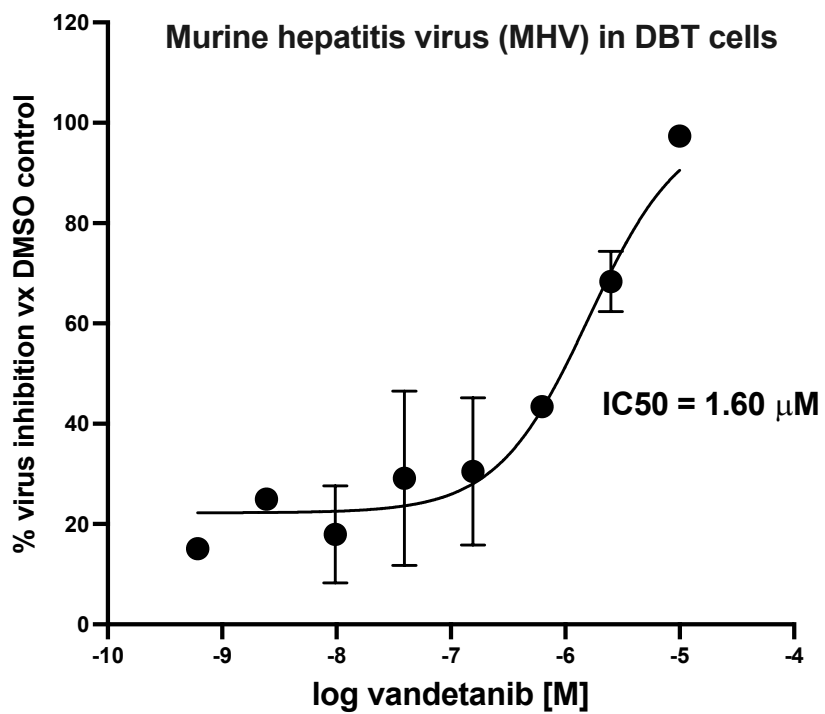

**Figure S1:** MHV in DBT cells, a model of SARS-CoV-2 replication. Vandetanib IC50 = 1.60  $\mu$ M.

**Table S1:** EC<sub>90</sub> and CC<sub>50</sub> values for vandetanib tested against SARS-CoV-2 (strain USA\_WA1/2020) in Caco-2 cells. Only VYR data was reported.

| <b>Compound</b>   | <b>EC<sub>90</sub> (μM)</b> | <b>CC<sub>50</sub> (μM)</b> | <b>SI</b>  |
|-------------------|-----------------------------|-----------------------------|------------|
| <b>Vandetanib</b> | <b>2</b>                    | <b>4.1</b>                  | <b>2.1</b> |
